# Supplementary material for: Exploring Changes in the Host Gut Microbiota During a Controlled Human Infection Model for Campylobacter jejuni
Source: PubMed Central journal article supplement (PMC8439579; doi:10.3389/fcimb.2021.702047), 2021-08-31

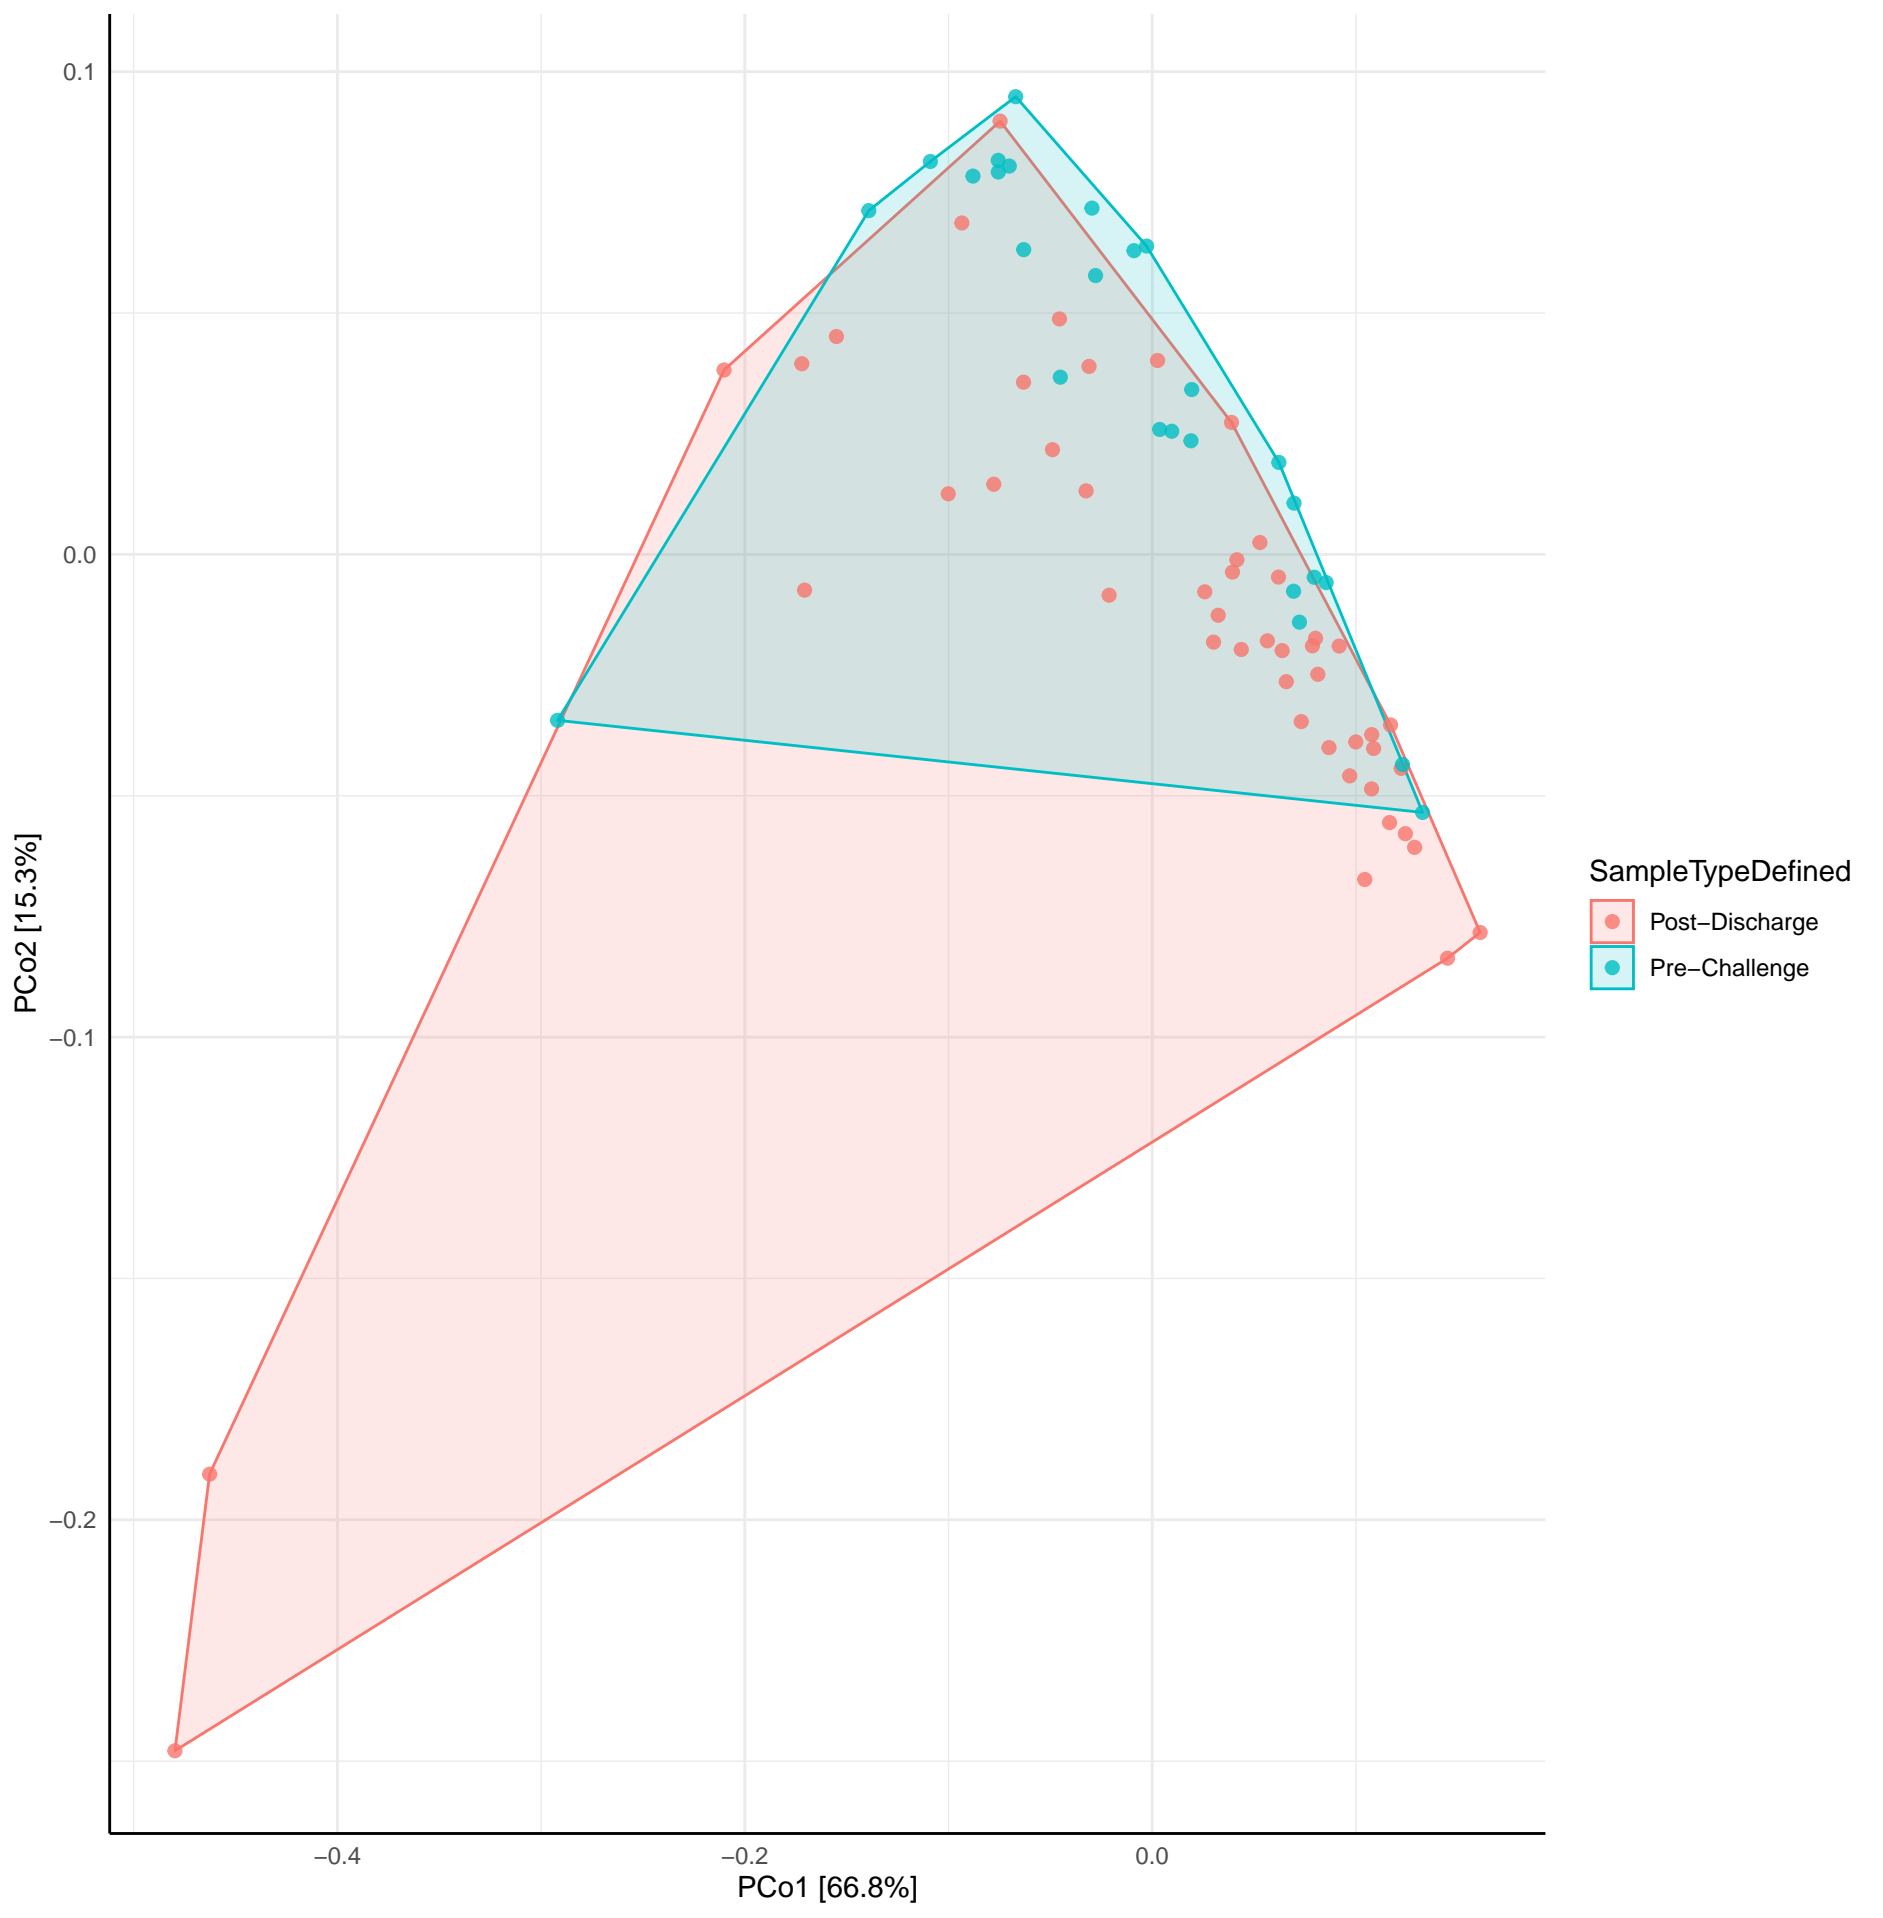

Supplement: DataSheet_5.pdf [file DataSheet_5.pdf]
